# Supplementary material for: The Origin and Nature of Tightly Clustered BTG1 Deletions in Precursor B-Cell Acute Lymphoblastic Leukemia Support a Model of Multiclonal Evolution
Source: PubMed Central journal article supplement (PMC3280973; doi:10.1371/journal.pgen.1002533), 2012-02-16
Supplement: pgen.1002533.s003.pdf [file pgen.1002533.s003.pdf]

**Table S1.** *BTG1* microdeletions co-occur with deletions in recurrently affected genes in BCP-ALL.

|               | Number of Samples <sup>a</sup> | <i>BTG1</i> deletion positive cases (%) | <i>BTG1</i> deletion negative cases (%) | P-value Chi-square |
|---------------|--------------------------------|-----------------------------------------|-----------------------------------------|--------------------|
| <i>EBF1</i>   |                                |                                         |                                         | <0.001             |
| Deletion      | 41                             | 11 (26.8)                               | 30 (73.2)                               |                    |
| No deletion   | 671                            | 53 (7.9)                                | 618 (92.1)                              |                    |
| <i>ETV6</i>   |                                |                                         |                                         | 0.007              |
| Deletion      | 162                            | 25 (15.4)                               | 137 (84.6)                              |                    |
| No deletion   | 470                            | 38 (8.1)                                | 432 (91.9)                              |                    |
| <i>RB1</i>    |                                |                                         |                                         | <0.001             |
| Deletion      | 60                             | 14 (23.3)                               | 46 (76.7)                               |                    |
| No deletion   | 567                            | 48 (8.5)                                | 519 (91.5)                              |                    |
| <i>IKZF1</i>  |                                |                                         |                                         | 0.154              |
| Deletion      | 104                            | 13 (12.5)                               | 91 (87.5)                               |                    |
| No deletion   | 609                            | 50 (8.2)                                | 559 (91.8)                              |                    |
| <i>PAX5</i>   |                                |                                         |                                         | 0.715              |
| Deletion      | 158                            | 15 (9.5)                                | 143 (90.5)                              |                    |
| No deletion   | 549                            | 47 (8.6)                                | 502 (91.4)                              |                    |
| <i>CDKN2A</i> |                                |                                         |                                         | 0.307              |
| Deletion      | 166                            | 20 (12.0)                               | 146 (88.0)                              |                    |
| No deletion   | 474                            | 44 (9.3)                                | 430 (90.7)                              |                    |
| <i>CDKN2B</i> |                                |                                         |                                         | 0.173              |
| Deletion      | 165                            | 21 (12.7)                               | 144 (87.3)                              |                    |
| No deletion   | 476                            | 43 (9.0)                                | 433 (91.0)                              |                    |

<sup>a</sup>Because of missing values, numbers do not always add up to 722 BCP-ALL cases
