# Supplementary material for: The Origin and Nature of Tightly Clustered BTG1 Deletions in Precursor B-Cell Acute Lymphoblastic Leukemia Support a Model of Multiclonal Evolution
Source: PubMed Central journal article supplement (PMC3280973; doi:10.1371/journal.pgen.1002533), 2012-02-16
Supplement: pgen.1002533.s004.pdf [file pgen.1002533.s004.pdf]

**Table S2.** *BTG1* deletion breakpoint sequences in *BTG1* MLPA deletion-positive BCP-ALL cases and cell lines.

| Patient/Cell line                    | Sequence                                             | Additional Nucleotides | Deletion |
|--------------------------------------|------------------------------------------------------|------------------------|----------|
| <b>Proximal (exon 2 <i>BTG1</i>)</b> |                                                      |                        |          |
| Reference                            | TCAGGAGCTGTTCAGGCTTCTCCCAAGTGAAGTCA <b>CACTCTGGG</b> |                        |          |
| BCP-ALL 1008                         | TCAGGAGCTGTTCAGGCTTCTCCCAAGTGA                       | cccctccctggggggcc      | III      |
| BCP-ALL 1014                         | TCAGGAGCTGTTCAGGCTTCTCCCAAGTGAAGTCA                  | tag                    | III      |
| BCP-ALL 1048                         | TCAGGAGCTGTTCAGGCTTCTCCCAAGTGAAGTCA                  | gg                     | III      |
| BCP-ALL 1069                         | TCAGGAGCTGTTCAGGC                                    | cggcccgagg             | III      |
| BCP-ALL 1084                         | TCAGGAGCTGTTCAGGCTTCTCCCAAGTGAAGTCA                  | tgggg                  | V        |
| BCP-ALL 1086                         | TCAGGAGCTGTTCAGGCTTCTCCCAAGT                         | agaaggggacc            | VI       |
| BCP-ALL 1097                         | TCAGGAGCTGTTCAGGCTTCTCCCAAG                          | cccc                   | III      |
| BCP-ALL 1134*1a                      | TCAGGAGCTGTTCAGGCTTCTCCCAAGTG                        | gaaa                   | III      |
| BCP-ALL 1134*1b                      | TCAGGAGCTGTTCAGGCTTCTCCCAAGTGAAGTCA                  | gg                     | III      |
| BCP-ALL 1134*2                       | TCAGGAGCTGTTCAGGCTTCTCCCAAGTGAAGTCA                  | ggggg                  | VIII     |
| BCP-ALL 1135*1                       | TCAGGAGCTGTTCAGGCTTCTCCCAAGT                         | cctagg                 | I        |
| BCP-ALL 1135*2                       | TCAGGAGCTGTTCAGGCTTCTCCCAAGTGAAGTCA                  | a                      | III      |
| BCP-ALL 1146*1a                      | TCAGGAGCTGTTCAGGCTTCTCCCAAGTGAA                      | g                      | III      |
| BCP-ALL 1146*1b                      | TCAGGAGCTGTTCAGGCTTCTCCCAAGTGAAGTCA                  | taa                    | III      |
| BCP-ALL 1146*2                       | TCAGGAGCTGTTCAGGCTTCTCCC                             | ggggtta                | V        |
| BCP-ALL 1146*3                       | TCAGGAGCTGTTCAGGCTTCTCCCAAGTGAAGTCA                  | cctc                   | VIII     |
| BCP-ALL 1157*1                       | TCAGGAGCTGTTCAGGCTTCTCCCAAGTGA                       | tctct                  | III      |
| BCP-ALL 1157*2                       | TCAGGAGCTGTTCAGGCTTCTCCCAAGTGAAGTCA                  | ccccccaatagg           | IV       |
| BCP-ALL 1177                         | TCAGGAGCTGTTCAGGCTTC                                 | cggg                   | III      |
| BCP-ALL 1216                         | TCAGGAGCTGTTCAGGCTTCTCCCAAGT                         | cctcagg                | III      |
| BCP-ALL 1238*1                       | TCAGGAGCTGTTCAGGCT                                   | cct                    | III      |
| BCP-ALL 1238*2                       | TCAGGA                                               | ccctgagg               | V        |
| BCP-ALL 1240*1                       | TCAGGAGCTGTTCAGGCTTC                                 | gttccc                 | II       |
| BCP-ALL 1240*2                       | TCAGGAGCTGTTCAGGCTTCTCCCAAGTGAAGTCA                  | cgatttagga             | III      |
| BCP-ALL 1244*1                       | TCAGGAGCTGTTCAGGCTTCTCCCAAGTGAAGTCA                  | ggg                    | III      |
| BCP-ALL 1244*2                       | TCAGGAGCTGTTCAGGCTTCTCCCAAGTGAA                      | ccctg                  | V        |
| BCP-ALL 1244*3                       | TCAGGAGCTGTTCAGGCTTCTCCCAAGTGAAGTCA                  | gat                    | VIII     |
| BCP-ALL 1264                         | TCAGGAGCTGTTCAGGCT                                   | cggg                   | III      |
| BCP-ALL 1273                         | TCAGGAGCTGTTCAGGCTTCTCCCAAGTGAAGTCA                  | tgagca                 | III      |
| BCP-ALL 1278                         | TCAGGAGCTGTTCAGGCTTCTCCCAAGTGAAGTCA                  | tcatgggg               | III      |
| BCP-ALL 1315                         | TCAGGAGCTGTTCAGGCTTC                                 | gttccc                 | II       |
| BCP-ALL 1316                         | TCAGGAGCTGTTCAGGCTTCTCCCAAGTGAAGTCA                  | ttcg                   | V        |
| BCP-ALL 1341*1                       | TCAGGAGCTGTTCAGGCTTC                                 | gttccc                 | II       |
| BCP-ALL 1341*2                       | TCAGGAGCTGTTCAGGCTTCTCCCAAG                          | ccaacctcggggg          | III      |
| BCP-ALL 1341*3                       | TCAGGAGCTGTTCAGGCTTCTCCCAAG                          | taaaagt                | V        |
| BCP-ALL 1341*4                       | TCAGGAGCTGTTCAGGCTTCTCCCAAGTGAAGTCA                  | ccttac                 | VIII     |
| BCP-ALL 1344*1                       | TCAGGAGCTGTTCAGGCTTCTCCCAAGTG                        | gggga                  | III      |
| BCP-ALL 1344*2a                      | TC                                                   | -                      | V        |
| BCP-ALL 1344*2b                      | TCAGGAGCTGTTCAGGCTTCTCCCAAGTGAAGTCA                  | gag                    | V        |
| BCP-ALL 1385                         | TCAGGAGCTGTTCAGG                                     | ttgcc                  | VIII     |
| BCP-ALL 1411                         | TCAGGAGCTGTTCAGGCTTCTCCCAAGTGAAGTCA                  | tggg                   | III      |
| BCP-ALL 1442                         | TCAGGAGCTGTTCAGGCT                                   | gcggggg                | III      |
| BCP-ALL 1457*1                       | TCAGGAGCTGTTCAGGCTTCTCCCAAGTGAAGTCA                  | ccctcccatttagatgaagg   | III      |
| BCP-ALL 1457*2                       | TCAGGAGCTGTTCAGGCTTCTCCCAAGTGAAGTCA                  | -                      | V        |
| BCP-ALL 1471                         | TCAGGAGCTGTTCAGGCTTCTCCCAAGTGAAGTCA                  | -                      | V        |
| BCP-ALL 1490                         | TCAGGAGCTGTTCAGGCTTC                                 | gttccc                 | II       |
| BCP-ALL 1529                         | TCAGGAGCTGTTCAGGCTTCTCCCAAGTGAAGTCA                  | tgg                    | III      |
| BCP-ALL 1545*1                       | TCAGGAGCTGTTCAGGCTTCTCCCAAGTGAAGTCA                  | ccccccg                | III      |

| Patient/Cell line                                                | Sequence                                                          | Additional Nucleotides | Deletion |
|------------------------------------------------------------------|-------------------------------------------------------------------|------------------------|----------|
| <b>Proximal (exon 2 BTG1)</b>                                    |                                                                   |                        |          |
| BCP-ALL 1545*2                                                   | TCAGGAGCTGTTCAGGCTTCTCCAAGT                                       | aag                    | V        |
| BCP-ALL 1559*1                                                   | TCAGGAGCTGTTCAGGCTTCTCCAAGTGAAC                                   | ccctcgagag             | III      |
| BCP-ALL 1559*2                                                   | TCAGGAGCTGTTCAGGCTTCTCCAAGTGAAC                                   | cgcggg                 | VIII     |
| BCP-ALL 1582                                                     | TCAGGAGCTGTTCAGGCTTCTCCAAGTGAAC                                   | cccaagg                | III      |
| BCP-ALL 1592                                                     | TCAGGAGCTGTTCAGGCTTCTCCAAGTGAAC                                   | ctgtt                  | III      |
| BCP-ALL 1598                                                     | TCAGGAGCTGTTCAGGCTTCTCCAAGTGAACTC                                 | cgggggag               | VII      |
| BCP-ALL 1599                                                     | TCAGGAGCTGTTCAGGCTTCTCCAAGTGA                                     | cacttccc               | III      |
| BCP-ALL 1629*1                                                   | TCAGGAGCTGTTCAGGCTTCTCCAAGTG                                      | cccct                  | III      |
| BCP-ALL 1736*2                                                   | TCAGGAGCTGTTCAGGCTTCTCCAAGTG                                      | ggg                    | VIII     |
| BCP-ALL 1630*1                                                   | TCAGGAGCTGTTCAGGCTTCTCCAAGTGAACTCA                                | tagggggg               | III      |
| BCP-ALL 1630*2                                                   | TCAGGAGCTGTTCAGGCTTCTCCAAGTG                                      | gga                    | VIII     |
| BCP-ALL 1654                                                     | TCAGGAGCTGTTCAGGCTTCTCCAAGTGAACTC                                 | cgggggag               | VII      |
| BCP-ALL 1736*1                                                   | TCAGGAGCTGTTCAGGCTTCTCCAAGTGAACTCA                                | tccgg                  | III      |
| BCP-ALL 1736*2                                                   | TCAGGAGCTGTTCAGGCTTCTCCAAGTG                                      | ggg                    | VIII     |
| BCP-ALL 1749                                                     | TCAGGAGCTGTTCAGGCTTCTCCAAGTGAA                                    | aggggagggg             | III      |
| BCP-ALL 1755                                                     | TCAGGAGCTGTTCAGGCTTCTCCAAGTGAACT                                  | gg                     | VIII     |
| BCP-ALL 1767                                                     | TCAGGAGCTGTTCAGGCTTC                                              | gttccc                 | II       |
| BCP-ALL 1772*1                                                   | TCAGGAGCTGTTCAGGCTTC                                              | aagg                   | III      |
| BCP-ALL 1772*2                                                   | TCAGGAGCTGTTCAGGCTTCTCCAAGT                                       | ccctgt                 | VIII     |
| BCP-ALL 1779                                                     | TCAGGAGCTGTTCAGGCTTCTCCAAGTGAACTC                                 | ttcc                   | V        |
| BCP-ALL 1827                                                     | TCAGGAGCTGTTCAGGCTTC                                              | gttccc                 | II       |
| BCP-ALL 1838                                                     | TCAGGAGCTGTTCAGGCTTCTCCAAGTGAACTCA                                | tg                     | VIII     |
| BCP-ALL 1853*1                                                   | TCAGGAGCTGTTCAGGCTTCTCCAAGTGAACTCA                                | tggt                   | III      |
| BCP-ALL 1853*2                                                   | TCAGGAGCTGTTCAGGCTTCTCCC                                          | ctc                    | IV       |
| BCP-ALL 1865                                                     | TCAGGAGCTGTTCAGGCTTCTCC                                           | ccccgc                 | III      |
| BCP-ALL 1888                                                     | TCAGGAGCTGTTCAGGCTTCTCCAAGTGAAC                                   | gaag                   | III      |
| BCP-ALL 1894                                                     | TCAGGAGCTGTTCAGGCTT                                               | cccc                   | VIII     |
| BCP-ALL 1896*1                                                   | TCAGGAGCTGTTCAGGCTTCTCCAAGTGAACTC                                 | tt                     | III      |
| BCP-ALL 1896*2                                                   | TCAGGAGCTGTTCAGGCTTCTCCAAGTGAACTCA                                | ga                     | VIII     |
| Cell line 380                                                    | TCAGGAGCTGTTCAGGCTTC                                              | gttccc                 | II       |
| Cell line Mutz5                                                  | TCAGGAGCTGTTCAGGCTTCTCCAAGTGAACT                                  | ag                     | IV       |
| Cell line REH                                                    | TCAGGAGCTGTTCAGGCTTCTCCAAGTGAAC                                   | cccgg                  | III      |
| Cell line SupB15                                                 | TCAGGAGCTGTTCAGGCTTCTCCAAGTGAACTCA                                | cca                    | IV       |
| <b>Distal deletion I</b>                                         |                                                                   |                        |          |
| Reference                                                        | GAGCTATGCT <b>ACTGTG</b> TAGCTTAGGACAACCTCGTTTGCTGCTCTGGTACTCAAGT |                        |          |
| BCP-ALL 1135*1                                                   | GCTTAGGACAACCTCGTTTGCTGCTCTGGTACTCAAGT                            |                        |          |
| <b>Distal deletion II</b>                                        |                                                                   |                        |          |
| Reference                                                        | CATACCTGTGTACGTGTTAATTTCTTTTTTTTTTTTTTTTTTTTTTTTGGAGACAGA         |                        |          |
| Cell line 380                                                    | TTTTTTTTTTTTTTTTTTGAGACAGA                                        |                        |          |
| BCP-ALL 1240*1                                                   | TTTTTTTTTTTTTTTTTTGAGACAGA                                        |                        |          |
| BCP-ALL 1315                                                     | TTTTTTTTTTTTTTGAGACAGA                                            |                        |          |
| BCP-ALL 1341*1                                                   | TTTTTTTTTTTTTTATGAGACAGA                                          |                        |          |
| BCP-ALL 1490                                                     | TTTTTTTTTTTTTTTTTTGAGACAGA                                        |                        |          |
| BCP-ALL 1767                                                     | TTTTTTTTTTTTTTCTGAGACAGA                                          |                        |          |
| BCP-ALL 1827                                                     | TTTTTTTTTTTTTTTTTTGAGACAGA                                        |                        |          |
| <b>Distal deletion III (most frequent recombination hotspot)</b> |                                                                   |                        |          |
| Reference                                                        | AAGATGTT <b>CATTGTG</b> TGAAACAGCGGCTCCTAGCTTTCATACATTTCCAGGATCA  |                        |          |
| BCP-ALL 1008                                                     | CGGCTCCTAGCTTTCATACATTTCCAGGATCA                                  |                        |          |
| BCP-ALL 1014                                                     | ACAGCGGCTCCTAGCTTTCATACATTTCCAGGATCA                              |                        |          |
| BCP-ALL 1048                                                     | GAAACAGCGGCTCCTAGCTTTCATACATTTCCAGGATCA                           |                        |          |
| BCP-ALL 1069                                                     | CAGCGGCTCCTAGCTTTCATACATTTCCAGGATCA                               |                        |          |
| BCP-ALL 1097                                                     | GAAACAGCGGCTCCTAGCTTTCATACATTTCCAGGATCA                           |                        |          |

| Patient/Cell line                                                | Sequence | Additional Nucleotides                                     | Deletion |
|------------------------------------------------------------------|----------|------------------------------------------------------------|----------|
| <b>Distal deletion III (most frequent recombination hotspot)</b> |          |                                                            |          |
| BCP-ALL 1134*1a                                                  |          | GCGGCTCCTAGCTTTCATACATTTCCAGGATCA                          |          |
| BCP-ALL 1134*1b                                                  |          | CGGCTCCTAGCTTTCATACATTTCCAGGATCA                           |          |
| BCP-ALL 1135*2                                                   |          | AGCGGCTCCTAGCTTTCATACATTTCCAGGATCA                         |          |
| BCP-ALL 1146*1a                                                  |          | GCGGCTCCTAGCTTTCATACATTTCCAGGATCA                          |          |
| BCP-ALL 1146*1b                                                  |          | GCGGCTCCTAGCTTTCATACATTTCCAGGATCA                          |          |
| BCP-ALL 1157*1                                                   |          | AGCGGCTCCTAGCTTTCATACATTTCCAGGATCA                         |          |
| BCP-ALL 1177                                                     |          | GGCTCCTAGCTTTCATACATTTCCAGGATCA                            |          |
| BCP-ALL 1216                                                     |          | TAGCTTTCATACATTTCCAGGATCA                                  |          |
| BCP-ALL 1238*1                                                   |          | AACAGCGGCTCCTAGCTTTCATACATTTCCAGGATCA                      |          |
| BCP-ALL 1240*2                                                   |          | TGAAACAGCGGCTCCTAGCTTTCATACATTTCCAGGATCA                   |          |
| BCP-ALL 1244*1                                                   |          | GCGGCTCCTAGCTTTCATACATTTCCAGGATCA                          |          |
| BCP-ALL 1264                                                     |          | ACAGCGGCTCCTAGCTTTCATACATTTCCAGGATCA                       |          |
| BCP-ALL 1273                                                     |          | GCGGCTCCTAGCTTTCATACATTTCCAGGATCA                          |          |
| BCP-ALL 1278                                                     |          | GCGGCTCCTAGCTTTCATACATTTCCAGGATCA                          |          |
| BCP-ALL 1341*2                                                   |          | ACAGCGGCTCCTAGCTTTCATACATTTCCAGGATCA                       |          |
| BCP-ALL 1344*1                                                   |          | TGAAACAGCGGCTCCTAGCTTTCATACATTTCCAGGATCA                   |          |
| BCP-ALL 1411                                                     |          | AACAGCGGCTCCTAGCTTTCATACATTTCCAGGATCA                      |          |
| BCP-ALL 1442                                                     |          | GCGGCTCCTAGCTTTCATACATTTCCAGGATCA                          |          |
| BCP-ALL 1457*1                                                   |          | GCGGCTCCTAGCTTTCATACATTTCCAGGATCA                          |          |
| BCP-ALL 1529                                                     |          | AACAGCGGCTCCTAGCTTTCATACATTTCCAGGATCA                      |          |
| BCP-ALL 1545*1                                                   |          | GCGGCTCCTAGCTTTCATACATTTCCAGGATCA                          |          |
| BCP-ALL 1559*1                                                   |          | AGCGGCTCCTAGCTTTCATACATTTCCAGGATCA                         |          |
| BCP-ALL 1582                                                     |          | GCGGCTCCTAGCTTTCATACATTTCCAGGATCA                          |          |
| BCP-ALL 1592                                                     |          | AAACAGCGGCTCCTAGCTTTCATACATTTCCAGGATCA                     |          |
| BCP-ALL 1599                                                     |          | CAGCGGCTCCTAGCTTTCATACATTTCCAGGATCA                        |          |
| BCP-ALL 1629                                                     |          | AAACAGCGGCTCCTAGCTTTCATACATTTCCAGGATCA                     |          |
| BCP-ALL 1630*1                                                   |          | CAGCGGCTCCTAGCTTTCATACATTTCCAGGATCA                        |          |
| BCP-ALL 1736*1                                                   |          | GAAACAGCGGCTCCTAGCTTTCATACATTTCCAGGATCA                    |          |
| BCP-ALL 1749                                                     |          | AACAGCGGCTCCTAGCTTTCATACATTTCCAGGATCA                      |          |
| BCP-ALL 1772*1                                                   |          | GAAACAGCGGCTCCTAGCTTTCATACATTTCCAGGATCA                    |          |
| BCP-ALL 1853*1                                                   |          | ACAGCGGCTCCTAGCTTTCATACATTTCCAGGATCA                       |          |
| BCP-ALL 1865                                                     |          | GCGGCTCCTAGCTTTCATACATTTCCAGGATCA                          |          |
| BCP-ALL 1888                                                     |          | CAGCGGCTCCTAGCTTTCATACATTTCCAGGATCA                        |          |
| BCP-ALL 1896*1                                                   |          | CAGCGGCTCCTAGCTTTCATACATTTCCAGGATCA                        |          |
| Cell line REH                                                    |          | GAAA TAGCGGCTCCTAGCTTTCATACATTTCCAGGATCA                   |          |
| <b>Distal deletion IV</b>                                        |          |                                                            |          |
| Reference                                                        |          | GAAGAAAACAGCTGTGTGCAGATAGACAATAGGGAAAAGGCACAGGAAGAGGAACT   |          |
| Cell line Mutz5                                                  |          | GATAGACAATAGGGAAAAGGCACAGGAAGAGGAACT                       |          |
| Cell line SupB15                                                 |          | TGCAGATAGACAATAGGGAAAAGGCACAGGAAGAGGAACT                   |          |
| BCP-ALL 1157*2                                                   |          | CAATAGGGAAAAGGCACAGGAAGAGGAACT                             |          |
| BCP-ALL 1853*2                                                   |          | GATAGACAATAGGGAAAAGGCACAGGAAGAGGAACT                       |          |
| <b>Distal deletion V (third frequent recombination hotspot)</b>  |          |                                                            |          |
| Reference                                                        |          | CCAATGCAC TGCAGT GCCAGCTCCAGGGCCAGGCAGTAAATATTTGTTGAATGAAA |          |
| BCP-ALL 1084                                                     |          | CCAGGGCCAGGCAGTAAATATTTGTTGAATGAAA                         |          |
| BCP-ALL 1146*2                                                   |          | CCAGGGCCAGGCAGTAAATATTTGTTGAATGAAA                         |          |
| BCP-ALL 1238*2                                                   |          | AGGGCCAGGCAGTAAATATTTGTTGAATGAAA                           |          |
| BCP-ALL 1244*2                                                   |          | CAGCTCCAGGGCCAGGCAGTAAATATTTGTTGAATGAAA                    |          |
| BCP-ALL 1316                                                     |          | GCTCCAGGGCCAGGCAGTAAATATTTGTTGAATGAAA                      |          |
| BCP-ALL 1341*2                                                   |          | CCAGGGCCAGGCAGTAAATATTTGTTGAATGAAA                         |          |
| BCP-ALL 1344*2a                                                  |          | CCAGGGCCAGGCAGTAAATATTTGTTGAATGAAA                         |          |
| BCP-ALL 1344*2b                                                  |          | CCAGCTCCAGGGCCAGGCAGTAAATATTTGTTGAATGAAA                   |          |
| BCP-ALL 1457*2                                                   |          | CAGCTCCAGGGCCAGGCAGTAAATATTTGTTGAATGAAA                    |          |

| Patient/Cell line                                                   | Sequence | Additional Nucleotides                                            | Deletion |
|---------------------------------------------------------------------|----------|-------------------------------------------------------------------|----------|
| <b>Distal deletion V (third frequent recombination hotspot)</b>     |          |                                                                   |          |
| BCP-ALL 1471                                                        |          | GCTCCAGGGCCAGGCAGTAAATATTTGTTGAATGAAA                             |          |
| BCP-ALL 1545*2                                                      |          | GGGGCAGGCAGTAAATATTTGTTGAATGAAA                                   |          |
| BCP-ALL 1779                                                        |          | CCAGCTCCAGGGCCAGGCAGTAAATATTTGTTGAATGAAA                          |          |
| <b>Distal deletion VI</b>                                           |          |                                                                   |          |
| Reference                                                           |          | GGGAATGGC <b>CTCTGTG</b> CCTGTCAGCTTGGACTTCCAAAGTCAGCAGGCTGGAATG  |          |
| BCP-ALL 1086                                                        |          | GTCAGCTTGGACTTCCAAAGTCAGCAGGCTGGAATG                              |          |
| <b>Distal deletion VII</b>                                          |          |                                                                   |          |
| Reference                                                           |          | AGATAAATT <b>CACAGTG</b> TAAAAGCAATTATGATTTCCATAGATATTGCCAATGTCAA |          |
| BCP-ALL 1598                                                        |          | ATGATTTCCATAGATATTGCCAATGTCAA                                     |          |
| BCP-ALL 1654                                                        |          | ATGATTTCCATAGATATTGCCAATGTCAA                                     |          |
| <b>Distal deletion VIII (second frequent recombination hotspot)</b> |          |                                                                   |          |
| Reference                                                           |          | TAACGTTAT <b>CACTGTG</b> GGACAGCGTAGTGTGTTTGGGAAAACCTAGTCTTTTTTGT |          |
| BCP-ALL 1134*2                                                      |          | AGCGTAGTGTGTTTGGGAAAACCTAGTCTTTTTTGT                              |          |
| BCP-ALL 1146*3                                                      |          | GACAGCGTAGTGTGTTTGGGAAAACCTAGTCTTTTTTGT                           |          |
| BCP-ALL 1244*3                                                      |          | AGCGTAGTGTGTTTGGGAAAACCTAGTCTTTTTTGT                              |          |
| BCP-ALL 1341*4                                                      |          | GCGTAGTGTGTTTGGGAAAACCTAGTCTTTTTTGT                               |          |
| BCP-ALL 1385                                                        |          | GACAGCGTAGTGTGTTTGGGAAAACCTAGTCTTTTTTGT                           |          |
| BCP-ALL 1559*2                                                      |          | AGCGTAGTGTGTTTGGGAAAACCTAGTCTTTTTTGT                              |          |
| BCP-ALL 1736*2                                                      |          | GCGTAGTGTGTTTGGGAAAACCTAGTCTTTTTTGT                               |          |
| BCP-ALL 1630*2                                                      |          | AGCGTAGTGTGTTTGGGAAAACCTAGTCTTTTTTGT                              |          |
| BCP-ALL 1736*2                                                      |          | GCGTAGTGTGTTTGGGAAAACCTAGTCTTTTTTGT                               |          |
| BCP-ALL 1755                                                        |          | CAGCGTAGTGTGTTTGGGAAAACCTAGTCTTTTTTGT                             |          |
| BCP-ALL 1772*2                                                      |          | ACAGCGTAGTGTGTTTGGGAAAACCTAGTCTTTTTTGT                            |          |
| BCP-ALL 1838                                                        |          | CAGCGTAGTGTGTTTGGGAAAACCTAGTCTTTTTTGT                             |          |
| BCP-ALL 1894                                                        |          | GGACAGCGTAGTGTGTTTGGGAAAACCTAGTCTTTTTTGT                          |          |
| BCP-ALL 1896*2                                                      |          | ACAGCGTAGTGTGTTTGGGAAAACCTAGTCTTTTTTGT                            |          |

Sequencing of intragenic *BTG1* deletions demonstrates the presence of (near) consensus DNA sequence motifs for V(D)J recombination flanking the breakpoint hotspot in exon 2 of *BTG1* and the distal breakpoint clusters. The consensus heptamer RSS [CAC(A/T)(A/G)(C/T)(A/G) on (+) strand and (C/T)(A/G)(C/T)(A/T)GTG on (-) strand] is shown in red and bold. Mismatches from consensus are underlined. Single nucleotide mutations are indicated in grey. The nucleotides inserted between the proximal *BTG1* and the distal breakpoints are indicated.
