# Supplementary material for: The Origin and Nature of Tightly Clustered BTG1 Deletions in Precursor B-Cell Acute Lymphoblastic Leukemia Support a Model of Multiclonal Evolution
Source: PubMed Central journal article supplement (PMC3280973; doi:10.1371/journal.pgen.1002533), 2012-02-16
Supplement: pgen.1002533.s005.pdf [file pgen.1002533.s005.pdf]

**Table S3.** Number of unique *BTG1* deletion-spanning sequences in the BTG1 MLPA deletion-positive BCP-ALL cases and cell lines.

| Patient/Cell line | Deletion |    |     |    |   |    |     |      | Total |
|-------------------|----------|----|-----|----|---|----|-----|------|-------|
|                   | I        | II | III | IV | V | VI | VII | VIII |       |
| BCP-ALL 1008      | 0        | 0  | 1   | 0  | 0 | 0  | 0   | 0    | 1     |
| BCP-ALL 1014      | 0        | 0  | 1   | 0  | 0 | 0  | 0   | 0    | 1     |
| BCP-ALL 1036      | 0        | 0  | 0   | 0  | 0 | 0  | 0   | 0    | 0     |
| BCP-ALL 1048      | 0        | 0  | 1   | 0  | 0 | 0  | 0   | 0    | 1     |
| BCP-ALL 1069      | 0        | 0  | 1   | 0  | 0 | 0  | 0   | 0    | 1     |
| BCP-ALL 1084      | 0        | 0  | 0   | 0  | 1 | 0  | 0   | 0    | 1     |
| BCP-ALL 1086      | 0        | 0  | 0   | 0  | 0 | 1  | 0   | 0    | 1     |
| BCP-ALL 1093      | 0        | 0  | 0   | 0  | 0 | 0  | 0   | 0    | 0     |
| BCP-ALL 1097      | 0        | 0  | 1   | 0  | 0 | 0  | 0   | 0    | 1     |
| BCP-ALL 1134      | 0        | 0  | 2   | 0  | 0 | 0  | 0   | 1    | 3     |
| BCP-ALL 1135      | 1        | 0  | 1   | 0  | 0 | 0  | 0   | 0    | 2     |
| BCP-ALL 1146      | 0        | 0  | 2   | 0  | 1 | 0  | 0   | 1    | 4     |
| BCP-ALL 1157      | 0        | 0  | 1   | 1  | 0 | 0  | 0   | 0    | 2     |
| BCP-ALL 1176      | 0        | 0  | 0   | 0  | 0 | 0  | 0   | 0    | 0     |
| BCP-ALL 1177      | 0        | 0  | 1   | 0  | 0 | 0  | 0   | 0    | 1     |
| BCP-ALL 1198      | 0        | 0  | 0   | 0  | 0 | 0  | 0   | 0    | 0     |
| BCP-ALL 1216      | 0        | 0  | 1   | 0  | 0 | 0  | 0   | 0    | 1     |
| BCP-ALL 1238      | 0        | 0  | 1   | 0  | 1 | 0  | 0   | 0    | 2     |
| BCP-ALL 1240      | 0        | 1  | 1   | 0  | 0 | 0  | 0   | 0    | 2     |
| BCP-ALL 1244      | 0        | 0  | 1   | 0  | 1 | 0  | 0   | 1    | 3     |
| BCP-ALL 1264      | 0        | 0  | 1   | 0  | 0 | 0  | 0   | 0    | 1     |
| BCP-ALL 1272      | 0        | 0  | 0   | 0  | 0 | 0  | 0   | 0    | 0     |
| BCP-ALL 1273      | 0        | 0  | 1   | 0  | 0 | 0  | 0   | 0    | 1     |
| BCP-ALL 1274      | 0        | 0  | 0   | 0  | 0 | 0  | 0   | 0    | 0     |
| BCP-ALL 1278      | 0        | 0  | 1   | 0  | 0 | 0  | 0   | 0    | 1     |
| BCP-ALL 1304      | 0        | 0  | 0   | 0  | 0 | 0  | 0   | 0    | 0     |
| BCP-ALL 1315      | 0        | 1  | 0   | 0  | 0 | 0  | 0   | 0    | 1     |
| BCP-ALL 1316      | 0        | 0  | 0   | 0  | 1 | 0  | 0   | 0    | 1     |
| BCP-ALL 1341      | 0        | 1  | 1   | 0  | 1 | 0  | 0   | 1    | 4     |
| BCP-ALL 1344      | 0        | 0  | 1   | 0  | 2 | 0  | 0   | 0    | 3     |
| BCP-ALL 1385      | 0        | 0  | 0   | 0  | 0 | 0  | 0   | 1    | 1     |
| BCP-ALL 1411      | 0        | 0  | 1   | 0  | 0 | 0  | 0   | 0    | 1     |
| BCP-ALL 1439      | 0        | 0  | 0   | 0  | 0 | 0  | 0   | 0    | 0     |
| BCP-ALL 1442      | 0        | 0  | 1   | 0  | 0 | 0  | 0   | 0    | 1     |
| BCP-ALL 1446      | 0        | 0  | 0   | 0  | 0 | 0  | 0   | 0    | 0     |
| BCP-ALL 1454      | 0        | 0  | 0   | 0  | 0 | 0  | 0   | 0    | 0     |
| BCP-ALL 1457      | 0        | 0  | 1   | 0  | 1 | 0  | 0   | 0    | 2     |
| BCP-ALL 1471      | 0        | 0  | 0   | 0  | 1 | 0  | 0   | 0    | 1     |
| BCP-ALL 1490      | 0        | 1  | 0   | 0  | 0 | 0  | 0   | 0    | 1     |
| BCP-ALL 1499      | 0        | 0  | 0   | 0  | 0 | 0  | 0   | 0    | 0     |
| BCP-ALL 1529      | 0        | 0  | 1   | 0  | 0 | 0  | 0   | 0    | 1     |
| BCP-ALL 1545      | 0        | 0  | 1   | 0  | 1 | 0  | 0   | 0    | 2     |
| BCP-ALL 1559      | 0        | 0  | 1   | 0  | 0 | 0  | 0   | 1    | 2     |
| BCP-ALL 1582      | 0        | 0  | 1   | 0  | 0 | 0  | 0   | 0    | 1     |
| BCP-ALL 1592      | 0        | 0  | 1   | 0  | 0 | 0  | 0   | 0    | 1     |
| BCP-ALL 1598      | 0        | 0  | 0   | 0  | 0 | 0  | 1   | 0    | 1     |
| BCP-ALL 1599      | 0        | 0  | 1   | 0  | 0 | 0  | 0   | 0    | 1     |
| BCP-ALL 1629      | 0        | 0  | 1   | 0  | 0 | 0  | 0   | 1    | 2     |

| Patient/Cell line | Deletion |          |           |          |           |          |          |           | Total     |
|-------------------|----------|----------|-----------|----------|-----------|----------|----------|-----------|-----------|
|                   | I        | II       | III       | IV       | V         | VI       | VII      | VIII      |           |
| BCP-ALL 1630      | 0        | 0        | 1         | 0        | 0         | 0        | 0        | 1         | 2         |
| BCP-ALL 1654      | 0        | 0        | 0         | 0        | 0         | 0        | 1        | 0         | 1         |
| BCP-ALL 1714      | 0        | 0        | 0         | 0        | 0         | 0        | 0        | 0         | 0         |
| BCP-ALL 1736      | 0        | 0        | 1         | 0        | 0         | 0        | 0        | 1         | 2         |
| BCP-ALL 1749      | 0        | 0        | 1         | 0        | 0         | 0        | 0        | 0         | 1         |
| BCP-ALL 1755      | 0        | 0        | 0         | 0        | 0         | 0        | 0        | 1         | 1         |
| BCP-ALL 1767      | 0        | 1        | 0         | 0        | 0         | 0        | 0        | 0         | 1         |
| BCP-ALL 1772      | 0        | 0        | 1         | 0        | 0         | 0        | 0        | 1         | 2         |
| BCP-ALL 1779      | 0        | 0        | 0         | 0        | 1         | 0        | 0        | 0         | 1         |
| BCP-ALL 1827      | 0        | 1        | 0         | 0        | 0         | 0        | 0        | 0         | 1         |
| BCP-ALL 1838      | 0        | 0        | 0         | 0        | 0         | 0        | 0        | 1         | 1         |
| BCP-ALL 1845      | 0        | 0        | 0         | 0        | 0         | 0        | 0        | 0         | 0         |
| BCP-ALL 1853      | 0        | 0        | 1         | 1        | 0         | 0        | 0        | 0         | 2         |
| BCP-ALL 1865      | 0        | 0        | 1         | 0        | 0         | 0        | 0        | 0         | 1         |
| BCP-ALL 1888      | 0        | 0        | 1         | 0        | 0         | 0        | 0        | 0         | 1         |
| BCP-ALL 1894      | 0        | 0        | 0         | 0        | 0         | 0        | 0        | 1         | 1         |
| BCP-ALL 1896      | 0        | 1        | 1         | 0        | 0         | 0        | 0        | 1         | 3         |
| Cell line 380     | 0        | 1        | 0         | 0        | 0         | 0        | 0        | 0         | 1         |
| Cell line Mutz5   | 0        | 0        | 0         | 1        | 0         | 0        | 0        | 0         | 1         |
| Cell line REH     | 0        | 0        | 1         | 0        | 0         | 0        | 0        | 0         | 1         |
| Cell line SupB15  | 0        | 0        | 0         | 1        | 0         | 0        | 0        | 0         | 1         |
| <b>Total</b>      | <b>1</b> | <b>8</b> | <b>40</b> | <b>4</b> | <b>12</b> | <b>1</b> | <b>2</b> | <b>14</b> | <b>82</b> |
