# Supplementary material for: The Origin and Nature of Tightly Clustered BTG1 Deletions in Precursor B-Cell Acute Lymphoblastic Leukemia Support a Model of Multiclonal Evolution
Source: PubMed Central journal article supplement (PMC3280973; doi:10.1371/journal.pgen.1002533), 2012-02-16
Supplement: pgen.1002533.s006.pdf [file pgen.1002533.s006.pdf]

**Table S4.** Subclonal *BTG1* microdeletion occurrence within the cytogenetic subgroups.

|                                     | Number of Samples <sup>a</sup> | <i>BTG1</i> deletion in minor subclone (%) | No <i>BTG1</i> deletion (%) | P-value Chi-square |
|-------------------------------------|--------------------------------|--------------------------------------------|-----------------------------|--------------------|
| T-ALL                               | 77                             | 0 (0)                                      | 77 (100)                    | <0.001             |
| BCP-ALL                             | 89                             | 16 (18.0)                                  | 73 (82.0)                   |                    |
| <i>Cytogenetic subgroup</i>         |                                |                                            |                             | 0.064              |
| <i>Hyperdiploid (&gt;50chr)</i>     |                                |                                            |                             | 0.030              |
| Yes                                 | 19                             | 0 (0)                                      | 19 (100)                    |                    |
| No                                  | 58                             | 13 (22.4)                                  | 45 (77.6)                   |                    |
| <i>ETV6-RUNX1</i>                   |                                |                                            |                             | 0.033              |
| Yes                                 | 8                              | 4 (50.0)                                   | 4 (50.0)                    |                    |
| No                                  | 33                             | 5 (15.2)                                   | 28 (84.8)                   |                    |
| <i>BCR-ABL1</i>                     |                                |                                            |                             | 1.000 <sup>d</sup> |
| Yes                                 | 1                              | 0 (0)                                      | 1 (100)                     |                    |
| No                                  | 59                             | 10 (16.9)                                  | 49 (83.1)                   |                    |
| <i>MLL rearranged</i>               |                                |                                            |                             | 1.000 <sup>d</sup> |
| Yes                                 | 1                              | 0 (0)                                      | 1 (100)                     |                    |
| No                                  | 73                             | 11 (15.1)                                  | 62 (84.9)                   |                    |
| <i>Other subgroup<sup>b</sup></i>   |                                |                                            |                             | 0.452              |
| Yes                                 | 23                             | 5 (21.7)                                   | 18 (78.3)                   |                    |
| No                                  | 29                             | 4 (13.8)                                   | 25 (86.2)                   |                    |
| <i>Subgroup unknown<sup>c</sup></i> |                                |                                            |                             | 0.845              |
| Yes                                 | 37                             | 7 (18.9)                                   | 30 (81.1)                   |                    |
| No                                  | 52                             | 9 (17.3)                                   | 43 (82.7)                   |                    |

All patients screened were *BTG1* deletion-negative as determined by MLPA. Subclonal *BTG1* deletion status was determined using the PCR-based detection of deletions III, V and VIII. <sup>a</sup>Because of missing values, numbers do not always add up to 89 BCP-ALL cases. Data was available for 77 cases on hyperdiploidy; 41 cases for *ETV6-RUNX1*; 60 cases for *BCR-ABL1*; 74 cases for *MLL*-rearrangement. <sup>b</sup>The other subgroup encompasses cases negative for *ETV6-RUNX1*, *MLL*, *BCR-ABL1* translocations and/or hyperdiploidy. This group does not contain any *E2A-PBX1* translocation cases. <sup>c</sup>Subgroup unknown includes all cases in which no data is available in one or more cytogenetic subgroups. <sup>d</sup>Fisher's exact test was used when sample groups were small.
