# Supplementary material for: The Origin and Nature of Tightly Clustered BTG1 Deletions in Precursor B-Cell Acute Lymphoblastic Leukemia Support a Model of Multiclonal Evolution
Source: PubMed Central journal article supplement (PMC3280973; doi:10.1371/journal.pgen.1002533), 2012-02-16
Supplement: pgen.1002533.s007.pdf [file pgen.1002533.s007.pdf]

**Table S5.** *BTG1* fusion transcript sequences detected in independent subclones.

| Patient                         | BTG1 Sequence                   | Additional Nucleotides | Distal Sequence                     |
|---------------------------------|---------------------------------|------------------------|-------------------------------------|
| <b>Deletion III</b>             |                                 |                        |                                     |
| Pt1 (BCP-ALL 1888) <sup>a</sup> | GAGCTGTTTCAGGCTTCTCCCAAGTGAAC   | gaag                   | CAGCGGCTCCTAGCTTTCATACATTTCCAGG     |
| Pt2 (BCP-ALL 1918)              | GAGCTGTTTCAGGCTTCTCCCA          | gcatgagg               | ACAGCGGCTCCTAGCTTTCATACATTTCCAGG    |
| Pt3 (BCP-ALL 1959) <sup>a</sup> | GAGCTGTTTCAGGCTTCTCCCAAGTGA     | ccgg                   | AGCGGCTCCTAGCTTTCATACATTTCCAGG      |
| Pt4 (BCP-ALL 1958) <sup>a</sup> | GAGCTGTTTCAGGCTTCTCCCAAG        | a                      | GGCTCCTAGCTTTCATACATTTCCAGG         |
| Pt5 (BCP-ALL 1982) <sup>a</sup> | GAGCTGTTTCAGGCTTCTCCCAAGTGAAC   | gc                     | AACAGCGGCTCCTAGCTTTCATACATTTCCAGG   |
| Pt6 (BCP-ALL 1457) <sup>a</sup> | GAGCTGTTTCAGGCTTCTCCCAAGTGAAGTC | ccctccatttagatgaagg    | AACAGCGGCTCCTAGCTTTCATACATTTCCAGG   |
| <b>Deletion V</b>               |                                 |                        |                                     |
| Pt1 (BCP-ALL 1888)              | GAGCTGTTTCAGGCTTCTCCCAAGTGA     | ccacc                  | CCAGCTCCAGGGCCAGGCAGTAAATATTTGTTGA  |
| Pt2 (BCP-ALL 1918)              | GAGCTGTTTCAGGCTTCTCC            | ggaac                  | GGGCCAGGCAGTAAATATTTGTTGA           |
| Pt4 (BCP-ALL 1958)              | GAGCTGTTTCAGGCTTCTCCCAAGTGAAGTC | tccgtcagg              | CCAGCTCCAGGGCCAGGCAGTAAATATTTGTTGA  |
| Pt6 (BCP-ALL 1457) <sup>a</sup> | GAGCTGTTTCAGGCTTCTCCCAAGTGAAGTC | -                      | CAGCTCCAGGGCCAGGCAGTAAATATTTGTTGA   |
| <b>Deletion VIII</b>            |                                 |                        |                                     |
| Pt2 (BCP-ALL 1918)              | GAGCTGTTTCAGGCTTCTCCCAA         | cccccg                 | GACAGCGTAGTGTGTTTGGGAAAACCTAGTCTTTT |
| Pt4 (BCP-ALL 1958)              | GAGCTGTTTCAGGCTTCTCCCAA         | tccag                  | GACAGCGTAGTGTGTTTGGGAAAACCTAGTCTTTT |

<sup>a</sup>Deletion spanning sequence was confirmed by sequencing of genomic DNA of the same case.
