# Supplementary material for: The Origin and Nature of Tightly Clustered BTG1 Deletions in Precursor B-Cell Acute Lymphoblastic Leukemia Support a Model of Multiclonal Evolution
Source: PubMed Central journal article supplement (PMC3280973; doi:10.1371/journal.pgen.1002533), 2012-02-16
Supplement: pgen.1002533.s008.pdf [file pgen.1002533.s008.pdf]

**Table S6.** MLPA probes for copy-number analysis of the *BTG1* gene region.

| Name   | Location               | Sequence*                                                                                                                                                |
|--------|------------------------|----------------------------------------------------------------------------------------------------------------------------------------------------------|
| BTG1_A | CLLUO1                 | 5'- <b>GGGTTCCCTAAGGGTTGGACA</b> AATTGGGGCACAACGAACTTAAGGAATGCCTTAAGACTGCC-3'<br>5'-ACTGGTAAGTAACAGGGGTTAATTAGAACCCACAGTGAGGGTTCTAGATTGGATCTTGCTGGCAC-3' |
| BTG1_B | <i>BTG1</i> before ex1 | 5'- <b>GGGTTCCCTAAGGGTTGGAT</b> CCAGCTACGCCACTTCCTTTTC-3'<br>5'- GTGGCACTATAAAGGGTGCTGCATCTAGATTGGATCTTGCTGGCAC-3'                                       |
| BTG1_C | <i>BTG1</i> ex2        | 5'- <b>GGGTTCCCTAAGGGTTGGAC</b> ACTCTGGGTTGACCCCTATGAAGT-3'<br>5'-GTCCTACAGAATTGGAGAGGATGGCTCTAGATTGGATCTTGCTGGCAC-3'                                    |
| BTG1_D | <i>BTG1</i> ex2        | 5'- <b>GGGTTCCCTAAGGGTTGGA</b> AAGACTGTCTCAACTGTGGTGTTAGCAC-3'<br>5'-CAGCCAGCTCTCTGTACATTTGCTAGCTTTCTAGATTGGATCTTGCTGGCAC-3'                             |
| BTG1_E | <i>BTG1</i> 3'         | 5'- <b>GGGTTCCCTAAGGGTTGGA</b> TGTCATCTCCCACTAGTTTCTAGCACACGGGCT-3'<br>5'-ACACACTCACTGGCCCACTTACCCTCTATTCTGTCTAGATTGGATCTTGCTGGCAC-3'                    |
| BTG1_F | <i>BTG1</i> 3'         | 5'- <b>GGGTTCCCTAAGGGTTGGA</b> GAGTGCTTCCTCTGATTACTCTGGATTTGTTGGTG-3'<br>5'-CGTAATTTTAAAGTGGGGCTCTGTGGTTTCCCATTCTAGATTGGATCTTGCTGGCAC-3'                 |
| BTG1_G | <i>BTG1</i> 3'         | 5'- <b>GGGTTCCCTAAGGGTTGGA</b> CGGAAAGATATAGTGGAGGGAAGATGTCCATGGCAGGGATG-3'<br>5'-TTGGAGGCACTGTGTCCAAACACGTTGGTAGGCTAGTACTGTCTAGATTGGATCTTGCTGGCAC-3'    |
| BTG1_H | <i>BTG1</i> 3'         | 5'- <b>GGGTTCCCTAAGGGTTGGA</b> CACCATGGACAGCAGGGCTGATTTATTACC-3'<br>5'-ATCCTAATGGCAAGTCATTCACTGAGCCGCATCTAGATTGGATCTTGCTGGCAC-3'                         |
| BTG1_I | DCNEX1                 | 5'- <b>GGGTTCCCTAAGGGTTGGACT</b> GTCAATGCCATCTTCGAGTGGTCCAGTGTTCTGATTT-3'<br>5'- GGGTGAGTGGGATGCAGTTTCTTTACCTACCTTACTTTCTAGATTGGATCTTGCTGGCAC-3'         |

\* Universal M13 PCR primers are indicated in bold
