# Supplementary material for: The Origin and Nature of Tightly Clustered BTG1 Deletions in Precursor B-Cell Acute Lymphoblastic Leukemia Support a Model of Multiclonal Evolution
Source: PubMed Central journal article supplement (PMC3280973; doi:10.1371/journal.pgen.1002533), 2012-02-16
Supplement: pgen.1002533.s009.pdf [file pgen.1002533.s009.pdf]

**Table S7.** Primers used for *BTG1* bisulfite sequencing, mutation screening, breakpoint mapping, expression analysis and CHIP assay.

|                                                     | Forward primer                                                         | Reverse primer                  |
|-----------------------------------------------------|------------------------------------------------------------------------|---------------------------------|
| <b>Bisulfite sequencing</b>                         |                                                                        |                                 |
|                                                     | 5'-TTGTTTTGGAGTGTAAAGTGTGG-3'                                          | 5'-TACAATCCTTTTTCTTAAACAAAAC-3' |
| <b><i>BTG1</i> sequencing</b>                       |                                                                        |                                 |
| Exon 1                                              | 5'-GACTCTGACCCAGGGATGTG-3'                                             | 5'-CATCACGCTCCAGCTACG-3'        |
| Exon 2                                              | 5'-TCCATAATCCATCCCAAGA-3'                                              | 5'-GGATGCAATCTGGACATT-3'        |
| <b><i>BTG1</i> breakpoint mapping</b>               |                                                                        |                                 |
| Deletion I                                          | 5'-TAGGATCTGCCCAATGTTG-3'                                              | 5'-GGATCCTCTGATTGGACAGG-3'      |
| Deletion II                                         | 5'-TGTACACATAAATGCTGATGAAGTC-3'                                        | 5'-TCACTGGTCCCAGAAAAGC-3'       |
| Deletion III                                        | 5'-CATGACATTTTAGGAGGACGTT-3'                                           | 5'-TCATTTTCGCTCCTCAAAGG-3'      |
| Deletion IV                                         | 5'-ACACTTACTTTTCACTTTGTAA-3'                                           | 5'-TCACTGGTCCCAGAAAAGC-3'       |
| Deletion V                                          | 5'-TCACTGAAGTGTGGCAATGG-3'                                             | 5'-TCATTTTCGCTCCTCAAAGG-3'      |
| Deletion VI                                         | 5'-CCCAGATCCATTCTTCTCA-3'                                              | 5'-TCACTGGTCCCAGAAAAGC-3'       |
| Deletion VII                                        | 5'-GGCTGCATTTTGTGATGA-3'                                               | 5'-TCACTGGTCCCAGAAAAGC-3'       |
| Deletion VIII                                       | 5'-CACTTCCCTTACCCATTGT-3'                                              | 5'-TCATTTTCGCTCCTCAAAGG-3'      |
| <b>RT-PCR</b>                                       |                                                                        |                                 |
| WT-BTG1-Fwd A                                       | 5'-ATGCATCCCTTCTACACCCGG-3'                                            |                                 |
| WT-BTG1-Rev B                                       |                                                                        | 5'-AATTCTGTAGGACACTTCATAGGG-3'  |
| Del II BTG1 <sup>trunc</sup> -Rev C                 |                                                                        | 5'-TTGCAGCGAGCTGGGATTGCGCCA-3'  |
| Del III BTG1 <sup>trunc</sup> -Rev D                |                                                                        | 5'-TTGATCCTGGAAATGTATGAAAGC-3'  |
| Del IV BTG1 <sup>trunc</sup> -Rev E                 |                                                                        | 5'-TGGATAAAGAAGATGAGACCAGA-3'   |
| Del VIII BTG1 <sup>trunc</sup> -Rev F               |                                                                        | 5'-CCAAAGCAGCCTCATTGCCTAATG-3'  |
| Del VIII BTG1 <sup>trunc</sup> -Rev G               |                                                                        | 5'-ACCCTCAACATAGATCATCAGTTA-3'  |
| <b>Real-time qRT-PCR primers</b>                    |                                                                        |                                 |
| BTG1ex1/2                                           | 5'-TGACGAGCGAGCGACAGCTGCA-3'                                           | 5'-GCATGGCTTTTCTGGGAACAGTG-3'   |
| BTG1ex2                                             | 5'-AGCACAGCGGATTGGACTGAGCAG-3'                                         | 5'-AATTCTGTAGGACACTTCATAGGG-3'  |
| HPRT                                                | 5'-TGACACTGGCAAACAATGCA-3'                                             | 5'-GGTCCTTTTACCAGCAAGCT-3'      |
| <b>Cloning and expression <i>BTG1</i> construct</b> |                                                                        |                                 |
| HA-BTG1-Fwd                                         | 5'-GCGAATTCGACCATGGCTTACCCATACGATGTTCCAGATTACGCTCATCCCTTCTACACCCGGG-3' |                                 |
| BTG1-Trunc-Rev                                      | 5'-GCCTCGAGTCATTAACCTGGGAGAAGCCTGAACA-3'                               |                                 |
| TBP control                                         | 5'-GCACAGGAGCCAAGAGTGAA-3'                                             | 5'-ACATCACAGCTCCCACCAT-3'       |
| <b>ChIP primers</b>                                 |                                                                        |                                 |
| -1kb prom                                           | 5'-CGCCTTCTCTTACTGTTT-3'                                               | 5'-CAAATGCCGTCTAGCCTGAGTCC-3'   |
| Prox prom                                           | 5'-AACCGGCTTGCCTACAATGGTGC-3'                                          | 5'-GCAGCACCTTTATAGTGCCACGA-3'   |
| Exon 2                                              | 5'-TATTCGCATCAACCATAAAATGGA-3'                                         | 5'-AATTCTGTAGGACACTTCATAGGG-3'  |
| 3'UTR                                               | 5'-AGATAGTTGTAATACCAGCCGAC-3'                                          | 5'-AAGATCTATAGGCATAACCAGAAA-3'  |
